# Supplementary material
Source: Springer Nature journal article supplement (https://www.springermedizin.de/resource/supplementary/12913_2011_2709_MOESM2_ESM.pdf/9531218)

**Additional file 2** The postal survey completed by the patients in this study.

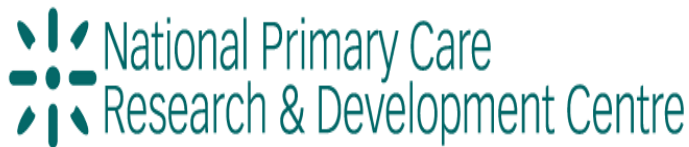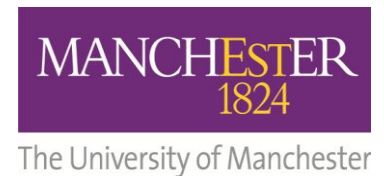

## Living with Long-term Conditions

Dear Sir or Madam,

The National Primary Care Research and Development Centre at the University of Manchester is funding a study looking at the experience of patients living with long-term conditions. Long-term conditions include a range of problems like diabetes, arthritis and heart disease.

Our aim is to develop a questionnaire that captures how you manage your condition, and how you understand your health and wellbeing. **Your GP fully supports this study.**

We would be grateful if you would complete this survey and return it in the prepaid envelope provided (no stamp is required). Some of the questions may seem quite similar. This is because we are trying to find the best way of asking certain questions and we would like your help in this process.

Please answer ALL the questions. **Your answers are very important to us.** There are no right or wrong answers, so please just read each question carefully and be as honest as you can.

All the data is completely anonymous and your name and address will not be used.

If you have any problems completing the form, or you would like further information about this study, please contact me on 0161 275 0741 and I will be happy to phone you back.

Many thanks for your time and help,

Researcher  
National Primary Care Research and Development Centre  
5th Floor, Williamson Building  
University of Manchester, Oxford Road  
Manchester, M13 9PL  
Tel: 0161 275 0741  
E-mail: [Nicola.small@manchester.ac.uk](mailto:Nicola.small@manchester.ac.uk)

## A. Your long-term health condition(s)...

1. What long term health condition(s) do you have?

(Please tick all the appropriate boxes which include any condition you have)

|                                                                             |                          |    |
|-----------------------------------------------------------------------------|--------------------------|----|
| 1. Diabetes                                                                 | <input type="checkbox"/> | 1  |
| 2. Chronic obstructive pulmonary disease (COPD)                             | <input type="checkbox"/> | 2  |
| 3. Coronary heart disease (CHD)                                             | <input type="checkbox"/> | 3  |
| 4. Irritable bowel syndrome (IBS) or abdominal (tummy) problems             | <input type="checkbox"/> | 4  |
| 5. Chronic fatigue syndrome, myalgic encephalomyelitis (ME) or fibromyalgia | <input type="checkbox"/> | 5  |
| 6. Arthritis or painful joints, back trouble, osteoporosis                  | <input type="checkbox"/> | 6  |
| 7. Heart problems or high blood pressure                                    | <input type="checkbox"/> | 7  |
| 8. Anxiety, depression or stress                                            | <input type="checkbox"/> | 8  |
| 9. Multiple sclerosis                                                       | <input type="checkbox"/> | 9  |
| 10. Other conditions (Please give details)                                  | <input type="checkbox"/> | 10 |

.....

.....

Please answer the following questions in terms of your long term condition(s)

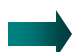

## B. About your beliefs, attitudes and feelings ...

Please read each statement carefully and then indicate the response that best describes the extent to which you agree or disagree in relation to your long-term condition(s)

|                                                                                         | Strongly Disagree                     | Disagree                              | Neither                               | Agree                                 | Strongly Agree                        |
|-----------------------------------------------------------------------------------------|---------------------------------------|---------------------------------------|---------------------------------------|---------------------------------------|---------------------------------------|
| 1. I often request additional health information from my doctor                         | <input type="checkbox"/> <sub>1</sub> | <input type="checkbox"/> <sub>2</sub> | <input type="checkbox"/> <sub>3</sub> | <input type="checkbox"/> <sub>4</sub> | <input type="checkbox"/> <sub>5</sub> |
| 2. I am aware I can change my mind about a treatment                                    | <input type="checkbox"/> <sub>1</sub> | <input type="checkbox"/> <sub>2</sub> | <input type="checkbox"/> <sub>3</sub> | <input type="checkbox"/> <sub>4</sub> | <input type="checkbox"/> <sub>5</sub> |
| 3. I actively manage my condition                                                       | <input type="checkbox"/> <sub>1</sub> | <input type="checkbox"/> <sub>2</sub> | <input type="checkbox"/> <sub>3</sub> | <input type="checkbox"/> <sub>4</sub> | <input type="checkbox"/> <sub>5</sub> |
| 4. I am still doing interesting things in my life despite my health problems            | <input type="checkbox"/> <sub>1</sub> | <input type="checkbox"/> <sub>2</sub> | <input type="checkbox"/> <sub>3</sub> | <input type="checkbox"/> <sub>4</sub> | <input type="checkbox"/> <sub>5</sub> |
| 5. I feel frustrated for other people who are struggling with similar conditions        | <input type="checkbox"/> <sub>1</sub> | <input type="checkbox"/> <sub>2</sub> | <input type="checkbox"/> <sub>3</sub> | <input type="checkbox"/> <sub>4</sub> | <input type="checkbox"/> <sub>5</sub> |
| 6. I am capable of handling my condition                                                | <input type="checkbox"/> <sub>1</sub> | <input type="checkbox"/> <sub>2</sub> | <input type="checkbox"/> <sub>3</sub> | <input type="checkbox"/> <sub>4</sub> | <input type="checkbox"/> <sub>5</sub> |
| 7. I am aware I can choose different treatment options                                  | <input type="checkbox"/> <sub>1</sub> | <input type="checkbox"/> <sub>2</sub> | <input type="checkbox"/> <sub>3</sub> | <input type="checkbox"/> <sub>4</sub> | <input type="checkbox"/> <sub>5</sub> |
| 8. I am satisfied with the level of health care information that I have available to me | <input type="checkbox"/> <sub>1</sub> | <input type="checkbox"/> <sub>2</sub> | <input type="checkbox"/> <sub>3</sub> | <input type="checkbox"/> <sub>4</sub> | <input type="checkbox"/> <sub>5</sub> |
| 9. I'm not bothered about understanding health information                              | <input type="checkbox"/> <sub>1</sub> | <input type="checkbox"/> <sub>2</sub> | <input type="checkbox"/> <sub>3</sub> | <input type="checkbox"/> <sub>4</sub> | <input type="checkbox"/> <sub>5</sub> |
| 10. I am satisfied with my control over the symptoms of my condition                    | <input type="checkbox"/> <sub>1</sub> | <input type="checkbox"/> <sub>2</sub> | <input type="checkbox"/> <sub>3</sub> | <input type="checkbox"/> <sub>4</sub> | <input type="checkbox"/> <sub>5</sub> |
| 11. I have a hopeful outlook towards my condition                                       | <input type="checkbox"/> <sub>1</sub> | <input type="checkbox"/> <sub>2</sub> | <input type="checkbox"/> <sub>3</sub> | <input type="checkbox"/> <sub>4</sub> | <input type="checkbox"/> <sub>5</sub> |

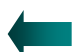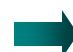

|                                                                                                  | Strongly Disagree                     | Disagree                              | Neither                               | Agree                                 | Strongly Agree                        |
|--------------------------------------------------------------------------------------------------|---------------------------------------|---------------------------------------|---------------------------------------|---------------------------------------|---------------------------------------|
| 12. I have helped people who have similar conditions find different ways to cope                 | <input type="checkbox"/> <sub>1</sub> | <input type="checkbox"/> <sub>2</sub> | <input type="checkbox"/> <sub>3</sub> | <input type="checkbox"/> <sub>4</sub> | <input type="checkbox"/> <sub>5</sub> |
| 13. I would acquire more health information when needed                                          | <input type="checkbox"/> <sub>1</sub> | <input type="checkbox"/> <sub>2</sub> | <input type="checkbox"/> <sub>3</sub> | <input type="checkbox"/> <sub>4</sub> | <input type="checkbox"/> <sub>5</sub> |
| 14. My health problems stop me from enjoying life                                                | <input type="checkbox"/> <sub>1</sub> | <input type="checkbox"/> <sub>2</sub> | <input type="checkbox"/> <sub>3</sub> | <input type="checkbox"/> <sub>4</sub> | <input type="checkbox"/> <sub>5</sub> |
| 15. I can minimise the impact of my symptoms on my life                                          | <input type="checkbox"/> <sub>1</sub> | <input type="checkbox"/> <sub>2</sub> | <input type="checkbox"/> <sub>3</sub> | <input type="checkbox"/> <sub>4</sub> | <input type="checkbox"/> <sub>5</sub> |
| 16. I find it difficult to ask my doctor to change my treatment                                  | <input type="checkbox"/> <sub>1</sub> | <input type="checkbox"/> <sub>2</sub> | <input type="checkbox"/> <sub>3</sub> | <input type="checkbox"/> <sub>4</sub> | <input type="checkbox"/> <sub>5</sub> |
| 17. I have shared my experience of managing my conditions with other people with health problems | <input type="checkbox"/> <sub>1</sub> | <input type="checkbox"/> <sub>2</sub> | <input type="checkbox"/> <sub>3</sub> | <input type="checkbox"/> <sub>4</sub> | <input type="checkbox"/> <sub>5</sub> |
| 18. I know where to go to find something out about my condition                                  | <input type="checkbox"/> <sub>1</sub> | <input type="checkbox"/> <sub>2</sub> | <input type="checkbox"/> <sub>3</sub> | <input type="checkbox"/> <sub>4</sub> | <input type="checkbox"/> <sub>5</sub> |
| 19. I have plans to do enjoyable things despite my health condition                              | <input type="checkbox"/> <sub>1</sub> | <input type="checkbox"/> <sub>2</sub> | <input type="checkbox"/> <sub>3</sub> | <input type="checkbox"/> <sub>4</sub> | <input type="checkbox"/> <sub>5</sub> |
| 20. I feel a sense of control over my condition                                                  | <input type="checkbox"/> <sub>1</sub> | <input type="checkbox"/> <sub>2</sub> | <input type="checkbox"/> <sub>3</sub> | <input type="checkbox"/> <sub>4</sub> | <input type="checkbox"/> <sub>5</sub> |
| 21. I feel I have a very good life despite my health problems                                    | <input type="checkbox"/> <sub>1</sub> | <input type="checkbox"/> <sub>2</sub> | <input type="checkbox"/> <sub>3</sub> | <input type="checkbox"/> <sub>4</sub> | <input type="checkbox"/> <sub>5</sub> |
| 22. I have information to handle difficulties related to my condition                            | <input type="checkbox"/> <sub>1</sub> | <input type="checkbox"/> <sub>2</sub> | <input type="checkbox"/> <sub>3</sub> | <input type="checkbox"/> <sub>4</sub> | <input type="checkbox"/> <sub>5</sub> |
| 23. I have shared with others how I keep myself well                                             | <input type="checkbox"/> <sub>1</sub> | <input type="checkbox"/> <sub>2</sub> | <input type="checkbox"/> <sub>3</sub> | <input type="checkbox"/> <sub>4</sub> | <input type="checkbox"/> <sub>5</sub> |
| 24. I have the skills that help me feel in control of my condition                               | <input type="checkbox"/> <sub>1</sub> | <input type="checkbox"/> <sub>2</sub> | <input type="checkbox"/> <sub>3</sub> | <input type="checkbox"/> <sub>4</sub> | <input type="checkbox"/> <sub>5</sub> |



|                                                                                                                 | Strongly Disagree                     | Disagree                              | Neither                               | Agree                                 | Strongly Agree                        |
|-----------------------------------------------------------------------------------------------------------------|---------------------------------------|---------------------------------------|---------------------------------------|---------------------------------------|---------------------------------------|
| 25. I would refuse a treatment if I thought it was not the best thing for me                                    | <input type="checkbox"/> <sub>1</sub> | <input type="checkbox"/> <sub>2</sub> | <input type="checkbox"/> <sub>3</sub> | <input type="checkbox"/> <sub>4</sub> | <input type="checkbox"/> <sub>5</sub> |
| 26. Knowing more about my condition helps me to manage it                                                       | <input type="checkbox"/> <sub>1</sub> | <input type="checkbox"/> <sub>2</sub> | <input type="checkbox"/> <sub>3</sub> | <input type="checkbox"/> <sub>4</sub> | <input type="checkbox"/> <sub>5</sub> |
| 27. I feel useful in my daily life despite my condition                                                         | <input type="checkbox"/> <sub>1</sub> | <input type="checkbox"/> <sub>2</sub> | <input type="checkbox"/> <sub>3</sub> | <input type="checkbox"/> <sub>4</sub> | <input type="checkbox"/> <sub>5</sub> |
| 28. My own experience has increased my understanding of what it is like for other people to have this condition | <input type="checkbox"/> <sub>1</sub> | <input type="checkbox"/> <sub>2</sub> | <input type="checkbox"/> <sub>3</sub> | <input type="checkbox"/> <sub>4</sub> | <input type="checkbox"/> <sub>5</sub> |
| 29. I can talk to my doctor if I change my mind concerning my treatment                                         | <input type="checkbox"/> <sub>1</sub> | <input type="checkbox"/> <sub>2</sub> | <input type="checkbox"/> <sub>3</sub> | <input type="checkbox"/> <sub>4</sub> | <input type="checkbox"/> <sub>5</sub> |
| 30. I know what my test results mean                                                                            | <input type="checkbox"/> <sub>1</sub> | <input type="checkbox"/> <sub>2</sub> | <input type="checkbox"/> <sub>3</sub> | <input type="checkbox"/> <sub>4</sub> | <input type="checkbox"/> <sub>5</sub> |
| 31. I can live a normal life despite my condition                                                               | <input type="checkbox"/> <sub>1</sub> | <input type="checkbox"/> <sub>2</sub> | <input type="checkbox"/> <sub>3</sub> | <input type="checkbox"/> <sub>4</sub> | <input type="checkbox"/> <sub>5</sub> |
| 32. I am confident choosing among different options related to my condition with my doctor                      | <input type="checkbox"/> <sub>1</sub> | <input type="checkbox"/> <sub>2</sub> | <input type="checkbox"/> <sub>3</sub> | <input type="checkbox"/> <sub>4</sub> | <input type="checkbox"/> <sub>5</sub> |
| 33. I accept that I have to live with my condition                                                              | <input type="checkbox"/> <sub>1</sub> | <input type="checkbox"/> <sub>2</sub> | <input type="checkbox"/> <sub>3</sub> | <input type="checkbox"/> <sub>4</sub> | <input type="checkbox"/> <sub>5</sub> |
| 34. I find my health problems take over my life                                                                 | <input type="checkbox"/> <sub>1</sub> | <input type="checkbox"/> <sub>2</sub> | <input type="checkbox"/> <sub>3</sub> | <input type="checkbox"/> <sub>4</sub> | <input type="checkbox"/> <sub>5</sub> |
| 35. I live my life one day at a time because of my condition                                                    | <input type="checkbox"/> <sub>1</sub> | <input type="checkbox"/> <sub>2</sub> | <input type="checkbox"/> <sub>3</sub> | <input type="checkbox"/> <sub>4</sub> | <input type="checkbox"/> <sub>5</sub> |
| 36. I need to know what is happening to me and why                                                              | <input type="checkbox"/> <sub>1</sub> | <input type="checkbox"/> <sub>2</sub> | <input type="checkbox"/> <sub>3</sub> | <input type="checkbox"/> <sub>4</sub> | <input type="checkbox"/> <sub>5</sub> |
| 37. I feel like I am actively involved in life despite my health problems                                       | <input type="checkbox"/> <sub>1</sub> | <input type="checkbox"/> <sub>2</sub> | <input type="checkbox"/> <sub>3</sub> | <input type="checkbox"/> <sub>4</sub> | <input type="checkbox"/> <sub>5</sub> |

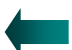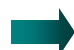

Strongly Disagree    Disagree    Neither    Agree    Strongly Agree

|                                                                                            |                                       |                                       |                                       |                                       |                                       |
|--------------------------------------------------------------------------------------------|---------------------------------------|---------------------------------------|---------------------------------------|---------------------------------------|---------------------------------------|
| 38. I have shared my understanding of my condition with people who have similar conditions | <input type="checkbox"/> <sub>1</sub> | <input type="checkbox"/> <sub>2</sub> | <input type="checkbox"/> <sub>3</sub> | <input type="checkbox"/> <sub>4</sub> | <input type="checkbox"/> <sub>5</sub> |
| 39. I participate in decisions concerning my health care                                   | <input type="checkbox"/> <sub>1</sub> | <input type="checkbox"/> <sub>2</sub> | <input type="checkbox"/> <sub>3</sub> | <input type="checkbox"/> <sub>4</sub> | <input type="checkbox"/> <sub>5</sub> |
| 40. I sometimes take health information to my doctor                                       | <input type="checkbox"/> <sub>1</sub> | <input type="checkbox"/> <sub>2</sub> | <input type="checkbox"/> <sub>3</sub> | <input type="checkbox"/> <sub>4</sub> | <input type="checkbox"/> <sub>5</sub> |
| 41. I know how to handle difficulties related to my condition                              | <input type="checkbox"/> <sub>1</sub> | <input type="checkbox"/> <sub>2</sub> | <input type="checkbox"/> <sub>3</sub> | <input type="checkbox"/> <sub>4</sub> | <input type="checkbox"/> <sub>5</sub> |
| 42. I try to make the most of my life despite my condition                                 | <input type="checkbox"/> <sub>1</sub> | <input type="checkbox"/> <sub>2</sub> | <input type="checkbox"/> <sub>3</sub> | <input type="checkbox"/> <sub>4</sub> | <input type="checkbox"/> <sub>5</sub> |
| 43. I understand my condition                                                              | <input type="checkbox"/> <sub>1</sub> | <input type="checkbox"/> <sub>2</sub> | <input type="checkbox"/> <sub>3</sub> | <input type="checkbox"/> <sub>4</sub> | <input type="checkbox"/> <sub>5</sub> |
| 44. I would feel able to refuse a decision made by my doctor concerning my treatment       | <input type="checkbox"/> <sub>1</sub> | <input type="checkbox"/> <sub>2</sub> | <input type="checkbox"/> <sub>3</sub> | <input type="checkbox"/> <sub>4</sub> | <input type="checkbox"/> <sub>5</sub> |
| 45. I have a positive outlook towards my condition                                         | <input type="checkbox"/> <sub>1</sub> | <input type="checkbox"/> <sub>2</sub> | <input type="checkbox"/> <sub>3</sub> | <input type="checkbox"/> <sub>4</sub> | <input type="checkbox"/> <sub>5</sub> |
| 46. People who are struggling with similar health conditions ask me for advice             | <input type="checkbox"/> <sub>1</sub> | <input type="checkbox"/> <sub>2</sub> | <input type="checkbox"/> <sub>3</sub> | <input type="checkbox"/> <sub>4</sub> | <input type="checkbox"/> <sub>5</sub> |
| 47. I have all the knowledge I need to manage my condition                                 | <input type="checkbox"/> <sub>1</sub> | <input type="checkbox"/> <sub>2</sub> | <input type="checkbox"/> <sub>3</sub> | <input type="checkbox"/> <sub>4</sub> | <input type="checkbox"/> <sub>5</sub> |
| 48. Without my health problems I could achieve more                                        | <input type="checkbox"/> <sub>1</sub> | <input type="checkbox"/> <sub>2</sub> | <input type="checkbox"/> <sub>3</sub> | <input type="checkbox"/> <sub>4</sub> | <input type="checkbox"/> <sub>5</sub> |
| 49. I know how to control my health problems                                               | <input type="checkbox"/> <sub>1</sub> | <input type="checkbox"/> <sub>2</sub> | <input type="checkbox"/> <sub>3</sub> | <input type="checkbox"/> <sub>4</sub> | <input type="checkbox"/> <sub>5</sub> |
| 50. I know enough about my condition                                                       | <input type="checkbox"/> <sub>1</sub> | <input type="checkbox"/> <sub>2</sub> | <input type="checkbox"/> <sub>3</sub> | <input type="checkbox"/> <sub>4</sub> | <input type="checkbox"/> <sub>5</sub> |
| 51. I feel there is purpose and meaning in my life despite my health problems              | <input type="checkbox"/> <sub>1</sub> | <input type="checkbox"/> <sub>2</sub> | <input type="checkbox"/> <sub>3</sub> | <input type="checkbox"/> <sub>4</sub> | <input type="checkbox"/> <sub>5</sub> |

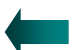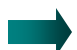

### C. You and your condition(s)...

The questions below ask about how you have been feeling about your condition(s) during the **past two weeks**. Please read each statement carefully and then indicate the response that best describes the extent to which you agree or disagree

|                                                                                                                         | Strongly Disagree                     | Disagree                              | Agree                                 | Strongly Agree                        |
|-------------------------------------------------------------------------------------------------------------------------|---------------------------------------|---------------------------------------|---------------------------------------|---------------------------------------|
| 1. I feel my condition is something I will never recover from                                                           | <input type="checkbox"/> <sub>1</sub> | <input type="checkbox"/> <sub>2</sub> | <input type="checkbox"/> <sub>4</sub> | <input type="checkbox"/> <sub>5</sub> |
| 2. I feel my condition is serious, but I will be able to return to life as it was before my illness                     | <input type="checkbox"/> <sub>1</sub> | <input type="checkbox"/> <sub>2</sub> | <input type="checkbox"/> <sub>4</sub> | <input type="checkbox"/> <sub>5</sub> |
| 3. I feel my condition has changed my life permanently so it will never be as good again                                | <input type="checkbox"/> <sub>1</sub> | <input type="checkbox"/> <sub>2</sub> | <input type="checkbox"/> <sub>4</sub> | <input type="checkbox"/> <sub>5</sub> |
| 4. I feel that I am the same person that I was before my illness                                                        | <input type="checkbox"/> <sub>1</sub> | <input type="checkbox"/> <sub>2</sub> | <input type="checkbox"/> <sub>4</sub> | <input type="checkbox"/> <sub>5</sub> |
| 5. I feel that my relationships with other people have not been negatively affected by my illness                       | <input type="checkbox"/> <sub>1</sub> | <input type="checkbox"/> <sub>2</sub> | <input type="checkbox"/> <sub>4</sub> | <input type="checkbox"/> <sub>5</sub> |
| 6. I feel that my experience with my condition has made me a better person                                              | <input type="checkbox"/> <sub>1</sub> | <input type="checkbox"/> <sub>2</sub> | <input type="checkbox"/> <sub>4</sub> | <input type="checkbox"/> <sub>5</sub> |
| 7. I feel that having my condition has interfered with my achievement of the most important goals I have set for myself | <input type="checkbox"/> <sub>1</sub> | <input type="checkbox"/> <sub>2</sub> | <input type="checkbox"/> <sub>4</sub> | <input type="checkbox"/> <sub>5</sub> |

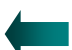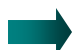

## D. Managing your condition(s)...

We would like to know **how confident** you feel about doing certain activities relating to managing your condition(s). For each of the following questions, please **circle** the number that corresponds to how confident you feel at the present time.

How confident are you that you can.....

1. ... do all the things necessary to manage your condition on a regular basis?  
(Please circle **one** number only)

1      2      3      4      5      6      7      8      9      10

Not at all confident

Totally confident

2. ... judge when the changes in your illness mean you should visit a doctor?  
(Please circle **one** number only)

1      2      3      4      5      6      7      8      9      10

Not at all confident

Totally confident

3. ... do the different tasks and activities needed to manage your health condition so as to reduce your need to see a doctor? (Please circle **one** number only)

1      2      3      4      5      6      7      8      9      10

Not at all confident

Totally confident

4. ... reduce the emotional distress caused by your health condition so that it does not affect your everyday life? (Please circle **one** number only)

1      2      3      4      5      6      7      8      9      10

Not at all confident

Totally confident

5. ... do things other than just taking medication to reduce how much your illness affects your everyday life? (Please circle **one** number only)

1      2      3      4      5      6      7      8      9      10

Not at all confident

Totally confident

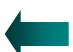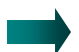



## E. Your visits to your GP surgery...

Staying healthy can be difficult when you have a chronic condition. We would like to learn about the help you get in relation to your condition(s) from your health care team. This might include your regular doctor, his or her nurse, or health care assistant who treats your condition.

When I received care for my chronic condition over the past six months, I was...

|                                                                             | Almost never                          | Generally not                         | Sometimes                             | Most of the time                      | Almost always                         |
|-----------------------------------------------------------------------------|---------------------------------------|---------------------------------------|---------------------------------------|---------------------------------------|---------------------------------------|
| 1. ... asked for my ideas when we made a treatment plan.                    | <input type="checkbox"/> <sub>1</sub> | <input type="checkbox"/> <sub>2</sub> | <input type="checkbox"/> <sub>3</sub> | <input type="checkbox"/> <sub>4</sub> | <input type="checkbox"/> <sub>5</sub> |
| 2. ... given choices about treatment to think about.                        | <input type="checkbox"/> <sub>1</sub> | <input type="checkbox"/> <sub>2</sub> | <input type="checkbox"/> <sub>3</sub> | <input type="checkbox"/> <sub>4</sub> | <input type="checkbox"/> <sub>5</sub> |
| 3. ... asked to talk about any problems with my medicines or their effects. | <input type="checkbox"/> <sub>1</sub> | <input type="checkbox"/> <sub>2</sub> | <input type="checkbox"/> <sub>3</sub> | <input type="checkbox"/> <sub>4</sub> | <input type="checkbox"/> <sub>5</sub> |
| 4. ... given a written list of things I should do to improve my health.     | <input type="checkbox"/> <sub>1</sub> | <input type="checkbox"/> <sub>2</sub> | <input type="checkbox"/> <sub>3</sub> | <input type="checkbox"/> <sub>4</sub> | <input type="checkbox"/> <sub>5</sub> |
| 5. ... satisfied that my care was well organised.                           | <input type="checkbox"/> <sub>1</sub> | <input type="checkbox"/> <sub>2</sub> | <input type="checkbox"/> <sub>3</sub> | <input type="checkbox"/> <sub>4</sub> | <input type="checkbox"/> <sub>5</sub> |
| 6. ... shown how what I did to take care of myself influenced my condition. | <input type="checkbox"/> <sub>1</sub> | <input type="checkbox"/> <sub>2</sub> | <input type="checkbox"/> <sub>3</sub> | <input type="checkbox"/> <sub>4</sub> | <input type="checkbox"/> <sub>5</sub> |
| 7. ... asked to talk about my goals in caring for my condition.             | <input type="checkbox"/> <sub>1</sub> | <input type="checkbox"/> <sub>2</sub> | <input type="checkbox"/> <sub>3</sub> | <input type="checkbox"/> <sub>4</sub> | <input type="checkbox"/> <sub>5</sub> |
| 8. ... helped to set specific goals to improve my eating or exercise.       | <input type="checkbox"/> <sub>1</sub> | <input type="checkbox"/> <sub>2</sub> | <input type="checkbox"/> <sub>3</sub> | <input type="checkbox"/> <sub>4</sub> | <input type="checkbox"/> <sub>5</sub> |
| 9. ... given a copy of my treatment plan.                                   | <input type="checkbox"/> <sub>1</sub> | <input type="checkbox"/> <sub>2</sub> | <input type="checkbox"/> <sub>3</sub> | <input type="checkbox"/> <sub>4</sub> | <input type="checkbox"/> <sub>5</sub> |

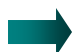

When I received care for my chronic condition over the past six months, I was...

|                                                                                                                               | Almost never                          | Generally not                         | Sometimes                             | Most of the time                      | Almost always                         |
|-------------------------------------------------------------------------------------------------------------------------------|---------------------------------------|---------------------------------------|---------------------------------------|---------------------------------------|---------------------------------------|
| 10. ... encouraged to go to a specific group or class to help me cope with my chronic condition.                              | <input type="checkbox"/> <sub>1</sub> | <input type="checkbox"/> <sub>2</sub> | <input type="checkbox"/> <sub>3</sub> | <input type="checkbox"/> <sub>4</sub> | <input type="checkbox"/> <sub>5</sub> |
| 11. ... asked questions, either directly or on a survey, about my health habits.                                              | <input type="checkbox"/> <sub>1</sub> | <input type="checkbox"/> <sub>2</sub> | <input type="checkbox"/> <sub>3</sub> | <input type="checkbox"/> <sub>4</sub> | <input type="checkbox"/> <sub>5</sub> |
| 12. ... sure that my doctor or nurse thought about my values, beliefs, and traditions when they recommended treatments to me. | <input type="checkbox"/> <sub>1</sub> | <input type="checkbox"/> <sub>2</sub> | <input type="checkbox"/> <sub>3</sub> | <input type="checkbox"/> <sub>4</sub> | <input type="checkbox"/> <sub>5</sub> |
| 13. ... helped to make a treatment plan that I could carry out in my daily life.                                              | <input type="checkbox"/> <sub>1</sub> | <input type="checkbox"/> <sub>2</sub> | <input type="checkbox"/> <sub>3</sub> | <input type="checkbox"/> <sub>4</sub> | <input type="checkbox"/> <sub>5</sub> |
| 14. ... helped to plan ahead so I could take care of my condition even in hard times                                          | <input type="checkbox"/> <sub>1</sub> | <input type="checkbox"/> <sub>2</sub> | <input type="checkbox"/> <sub>3</sub> | <input type="checkbox"/> <sub>4</sub> | <input type="checkbox"/> <sub>5</sub> |
| 15. ... asked how my chronic condition affects my life.                                                                       | <input type="checkbox"/> <sub>1</sub> | <input type="checkbox"/> <sub>2</sub> | <input type="checkbox"/> <sub>3</sub> | <input type="checkbox"/> <sub>4</sub> | <input type="checkbox"/> <sub>5</sub> |
| 16. ... contacted after a visit to see how things were going.                                                                 | <input type="checkbox"/> <sub>1</sub> | <input type="checkbox"/> <sub>2</sub> | <input type="checkbox"/> <sub>3</sub> | <input type="checkbox"/> <sub>4</sub> | <input type="checkbox"/> <sub>5</sub> |
| 17. ... encouraged to attend programs in the community that could help me.                                                    | <input type="checkbox"/> <sub>1</sub> | <input type="checkbox"/> <sub>2</sub> | <input type="checkbox"/> <sub>3</sub> | <input type="checkbox"/> <sub>4</sub> | <input type="checkbox"/> <sub>5</sub> |

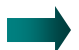

Over the past six months, when I received care for my chronic condition, I was...

|                                                                                                              | Almost never                          | Generally not                         | Sometimes                             | Most of the time                      | Almost always                         |
|--------------------------------------------------------------------------------------------------------------|---------------------------------------|---------------------------------------|---------------------------------------|---------------------------------------|---------------------------------------|
| 18. ... referred to a dietitian, health educator, or counselor.                                              | <input type="checkbox"/> <sub>1</sub> | <input type="checkbox"/> <sub>2</sub> | <input type="checkbox"/> <sub>3</sub> | <input type="checkbox"/> <sub>4</sub> | <input type="checkbox"/> <sub>5</sub> |
| 19. ... told how my visits with other types of doctors, like the eye doctor or surgeon, helped my treatment. | <input type="checkbox"/> <sub>1</sub> | <input type="checkbox"/> <sub>2</sub> | <input type="checkbox"/> <sub>3</sub> | <input type="checkbox"/> <sub>4</sub> | <input type="checkbox"/> <sub>5</sub> |
| 20. ... asked how my visits with other doctors were going.                                                   | <input type="checkbox"/> <sub>1</sub> | <input type="checkbox"/> <sub>2</sub> | <input type="checkbox"/> <sub>3</sub> | <input type="checkbox"/> <sub>4</sub> | <input type="checkbox"/> <sub>5</sub> |

## F. Seeing the doctor you prefer...

1. Is there a particular doctor you prefer to see at your GP surgery or health centre?

Yes

<sub>1</sub>

No

<sub>2</sub>

There is usually only one doctor in my GP surgery or health centre

<sub>3</sub>

2. How often do you see the doctor you prefer to see?

Always or almost always

<sub>1</sub>

A lot of the time

<sub>2</sub>

Some of the time

<sub>3</sub>

Never or almost never

<sub>4</sub>

Not tried at this GP surgery or health centre

<sub>5</sub>


## G. Seeing a doctor in the GP surgery or health centre...

Please answer these next questions about the **last time** you saw a doctor at your GP surgery about your long-term condition(s)

1. The **last time** you saw a doctor at your GP surgery or health centre, how good was the doctor at each of the following?

|                                               | Very Good                             | Good                                  | Neither                               | Poor                                  | Very poor                             | Does not apply                        |
|-----------------------------------------------|---------------------------------------|---------------------------------------|---------------------------------------|---------------------------------------|---------------------------------------|---------------------------------------|
| a. Giving you enough time                     | <input type="checkbox"/> <sub>1</sub> | <input type="checkbox"/> <sub>2</sub> | <input type="checkbox"/> <sub>3</sub> | <input type="checkbox"/> <sub>4</sub> | <input type="checkbox"/> <sub>5</sub> | <input type="checkbox"/> <sub>6</sub> |
| b. Asking about your symptoms                 | <input type="checkbox"/> <sub>1</sub> | <input type="checkbox"/> <sub>2</sub> | <input type="checkbox"/> <sub>3</sub> | <input type="checkbox"/> <sub>4</sub> | <input type="checkbox"/> <sub>5</sub> | <input type="checkbox"/> <sub>6</sub> |
| c. Listening to you                           | <input type="checkbox"/> <sub>1</sub> | <input type="checkbox"/> <sub>2</sub> | <input type="checkbox"/> <sub>3</sub> | <input type="checkbox"/> <sub>4</sub> | <input type="checkbox"/> <sub>5</sub> | <input type="checkbox"/> <sub>6</sub> |
| d. Explaining tests and treatments            | <input type="checkbox"/> <sub>1</sub> | <input type="checkbox"/> <sub>2</sub> | <input type="checkbox"/> <sub>3</sub> | <input type="checkbox"/> <sub>4</sub> | <input type="checkbox"/> <sub>5</sub> | <input type="checkbox"/> <sub>6</sub> |
| e. Involving you in decisions about your care | <input type="checkbox"/> <sub>1</sub> | <input type="checkbox"/> <sub>2</sub> | <input type="checkbox"/> <sub>3</sub> | <input type="checkbox"/> <sub>4</sub> | <input type="checkbox"/> <sub>5</sub> | <input type="checkbox"/> <sub>6</sub> |
| f. Treating you with care and concern         | <input type="checkbox"/> <sub>1</sub> | <input type="checkbox"/> <sub>2</sub> | <input type="checkbox"/> <sub>3</sub> | <input type="checkbox"/> <sub>4</sub> | <input type="checkbox"/> <sub>5</sub> | <input type="checkbox"/> <sub>6</sub> |
| g. Taking your problems seriously             | <input type="checkbox"/> <sub>1</sub> | <input type="checkbox"/> <sub>2</sub> | <input type="checkbox"/> <sub>3</sub> | <input type="checkbox"/> <sub>4</sub> | <input type="checkbox"/> <sub>5</sub> | <input type="checkbox"/> <sub>6</sub> |

Please answer these next questions about the **last time** you saw a doctor at your GP surgery about your long-term condition(s)...

2. When you **last** saw a doctor at your GP surgery about your long-term condition, did you have confidence and trust in that doctor?

Yes, definitely <sub>1</sub>

Yes, to some extent <sub>2</sub>

No, not at all <sub>3</sub>

Don't know/ can't say <sub>4</sub>

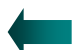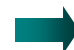

3. When was the **last time** you visited your GP surgery to see your GP or Practice nurse?

Month

Year

4. Thinking about the **last visit** you made to your GP surgery, was this to see your...

GP <sub>1</sub>

Nurse <sub>2</sub>

Please answer these next questions about the **last time** you saw a doctor at your GP surgery about your long-term condition...

5. For each of the below, please tick the box that best describes how you felt **immediately after** the visit:

|                                    | Much better                           | Better                                | Same or less                          | Not applicable                        |
|------------------------------------|---------------------------------------|---------------------------------------|---------------------------------------|---------------------------------------|
| a) Able to cope with life          | <input type="checkbox"/> <sub>1</sub> | <input type="checkbox"/> <sub>2</sub> | <input type="checkbox"/> <sub>3</sub> | <input type="checkbox"/> <sub>4</sub> |
| b) Able to understand your illness | <input type="checkbox"/> <sub>1</sub> | <input type="checkbox"/> <sub>2</sub> | <input type="checkbox"/> <sub>3</sub> | <input type="checkbox"/> <sub>4</sub> |
| c) Able to cope with your illness  | <input type="checkbox"/> <sub>1</sub> | <input type="checkbox"/> <sub>2</sub> | <input type="checkbox"/> <sub>3</sub> | <input type="checkbox"/> <sub>4</sub> |
| d) Able to keep yourself healthy   | <input type="checkbox"/> <sub>1</sub> | <input type="checkbox"/> <sub>2</sub> | <input type="checkbox"/> <sub>3</sub> | <input type="checkbox"/> <sub>4</sub> |
|                                    | Much more                             | More                                  | Same or less                          | Not applicable                        |
| e) Confident about your health     | <input type="checkbox"/> <sub>1</sub> | <input type="checkbox"/> <sub>2</sub> | <input type="checkbox"/> <sub>3</sub> | <input type="checkbox"/> <sub>4</sub> |
| f) Able to help yourself           | <input type="checkbox"/> <sub>1</sub> | <input type="checkbox"/> <sub>2</sub> | <input type="checkbox"/> <sub>3</sub> | <input type="checkbox"/> <sub>4</sub> |

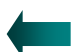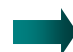

## H. About you...

Please answer the following questions. Either tick one box or write your answer in the space provided.

Please remember that all the information given will be confidential.

1. Are you: Male <sub>1</sub>  
Female <sub>2</sub>

2. How old are you now? \_\_\_\_\_ years

3. Which ethnic group do you belong to? *(Please tick only one box)*

- |                   |                                       |                      |                                       |
|-------------------|---------------------------------------|----------------------|---------------------------------------|
| White             | <input type="checkbox"/> <sub>1</sub> | Indian               | <input type="checkbox"/> <sub>5</sub> |
| Black – Caribbean | <input type="checkbox"/> <sub>2</sub> | Pakistani            | <input type="checkbox"/> <sub>6</sub> |
| Black – African   | <input type="checkbox"/> <sub>3</sub> | Bangladeshi          | <input type="checkbox"/> <sub>7</sub> |
| Black – other     | <input type="checkbox"/> <sub>4</sub> | Chinese              | <input type="checkbox"/> <sub>8</sub> |
| Other             | <input type="checkbox"/> <sub>9</sub> | Please specify _____ |                                       |

4. Which of these qualifications do you have? *(Please tick all that apply)*

- |                                          |                                       |
|------------------------------------------|---------------------------------------|
| 1 or more O levels/CSE/GCSEs (any grade) | <input type="checkbox"/> <sub>1</sub> |
| 1 or more A levels or AS levels          | <input type="checkbox"/> <sub>2</sub> |
| Degree                                   | <input type="checkbox"/> <sub>3</sub> |
| NVQ                                      | <input type="checkbox"/> <sub>4</sub> |
| Other trade qualification                | <input type="checkbox"/> <sub>5</sub> |
| A professional qualification             | <input type="checkbox"/> <sub>6</sub> |
| No qualifications                        | <input type="checkbox"/> <sub>7</sub> |



5. Which of these best describes your current work situation?  
(Please tick all that apply)

- In paid work (full or part-time including self-employed)  1
- Unemployed  2
- Retired from paid work  3
- Unable to work because of long-term disability or ill health  4
- Looking after the family or home  5
- In full-time education or training  6
- Voluntary work  7
- Other  8
- If other please describe:

6. Is your accommodation: (Please tick one box only)

- Owner-occupied/mortgaged  1
- Rented from local authority/housing association  2
- Rented from a private landlord  3
- Other arrangements  4
- If other please describe:

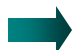

## About you...

7. How long have you been seeing the doctor/nurse with this condition?  
*(If you are unsure, please estimate in the box below)*

Years

8. In general, how would you rate your health?

- |           |                          |   |
|-----------|--------------------------|---|
| Excellent | <input type="checkbox"/> | 1 |
| Very good | <input type="checkbox"/> | 2 |
| Good      | <input type="checkbox"/> | 3 |
| Fair      | <input type="checkbox"/> | 4 |
| Poor      | <input type="checkbox"/> | 5 |

## *Any Comments?*

The space below is for any comments you may have regarding the pilot survey you have just completed

**Please return the questionnaire in the enclosed prepaid envelope provided (no stamp is required).**

**Thank you very much for taking part.**



Supplement: MOESM2 [file 9531218]
